# Supplementary material for: Residential Proximity to Major Roadways Is Not Associated with Cardiac Function in African Americans: Results from the Jackson Heart Study
Source: MDPI journal article supplement (doi:10.3390/ijerph13060581), 2016-06-13
Supplement: s1 [file s1]

# Supplementary Materials: Residential Proximity to Major Roadways Is Not Associated with Cardiac Function in African Americans: Results from the Jackson Heart Study

Anne M. Weaver, Gregory A. Wellenius, Wen-Chih Wu, DeMarc A. Hickson, Masoor Kamalesh and Yi Wang

**Table S1.** Results from linear or logistic regression of residential distance to A1 roads on markers of cardiac function among participants in the Jackson Heart Study ( $n = 4866$ )<sup>a</sup>.

| Marker of Cardiac Function           | <150 m ( $n = 106$ )         | 150–299 m ( $n = 159$ )      | 300–999 m ( $n = 1161$ )     | ≥1000 m ( $n = 3440$ )       | Log-Transformed Distance to Road (Continuous) |
|--------------------------------------|------------------------------|------------------------------|------------------------------|------------------------------|-----------------------------------------------|
|                                      | Beta (95% CI) or OR (95% CI) | Beta (95% CI) or OR (95% CI) | Beta (95% CI) or OR (95% CI) | Beta (95% CI) or OR (95% CI) | Beta (95% CI) or OR (95% CI)                  |
| Depressed LVEF, OR (95% CI)          | 2.39 (0.69, 8.23)            | 1.47 (0.58, 3.73)            | 0.49 (0.28, 0.86) *          | 1.0 (ref)                    | 1.07 (0.90, 1.28)                             |
| E-wave velocity (m/s)                | −0.04 (−0.1, 0.03)           | −0.007 (−0.05, 0.03)         | 0.0009 (−0.01, 0.02)         | 0 (ref)                      | −0.003 (−0.009, 0.004)                        |
| Log isovolumic relaxation time       | 0.02 (−0.06, 0.1)            | 0.03 (−0.02, 0.08)           | −0.006 (−0.02, 0.01)         | 0 (ref)                      | 0.007 (−0.0005, 0.01)                         |
| LA diameter index, mm/m <sup>2</sup> | 0.2 (−0.5, 1.0)              | −0.1 (−0.6, 0.4)             | −0.1 (−0.3, 0.03)            | 0 (ref)                      | 0.06 (−0.01, 0.1)                             |
| Log PASP                             | 0.02 (−0.07, 0.1)            | 0.04 (−0.02, 0.1)            | 0.006 (−0.2, 0.03)           | 0 (ref)                      | −0.007 (−0.02, 0.003)                         |

<sup>a</sup> Adjusted for age, sex, BMI, alcohol consumption, physical activity status, educational level, occupation, smoking status, and neighborhood socioeconomic status; \*  $p < 0.05$ .

**Table S2.** Results from linear or logistic regression of residential distance to A1 or A2 roads on markers of cardiac function among participants in the Jackson Heart Study, excluding those with CVD ( $n = 4353$ ) <sup>a</sup>.

| Marker of Cardiac Function           | <150 m ( $n = 106$ )         | 150–299 m ( $n = 159$ )      | 300–999 m ( $n = 1161$ )     | ≥1000 m ( $n = 3440$ )       | Log-Transformed Distance to Road (Continuous) |
|--------------------------------------|------------------------------|------------------------------|------------------------------|------------------------------|-----------------------------------------------|
|                                      | Beta (95% CI) or OR (95% CI) | Beta (95% CI) or OR (95% CI) | Beta (95% CI) or OR (95% CI) | Beta (95% CI) or OR (95% CI) | Beta (95% CI) or OR (95% CI)                  |
| Depressed LVEF, OR (95% CI)          | 0.63 (0.15, 2.63)            | 0.89 (0.32, 2.50)            | 0.66 (0.41, 1.07)            | 1.0 (ref)                    | 1.08 (0.90, 1.30)                             |
| E-wave velocity (m/s)                | −0.004 (−0.04, 0.04)         | 0.003 (−0.03, 0.04)          | 0.0007 (−0.01, 0.01)         | 0 (ref)                      | 0.0005 (−0.005, 0.006)                        |
| Log isovolumic relaxation time       | 0.02 (−0.03, 0.07)           | 0.02 (−0.02, 0.06)           | −0.009 (−0.03, 0.007)        | 0 (ref)                      | 0.0003 (−0.007, 0.007)                        |
| LA diameter index, mm/m <sup>2</sup> | −0.03 (−0.5, 0.4)            | −0.4 (−0.8, −0.03)*          | −0.2 (−0.3, 0.005)           | 0 (ref)                      | 0.07 (0.01, 0.1) *                            |
| Log PASP                             | 0.002 (−0.06, 0.06)          | 0.03 (−0.02, 0.08)           | 0.02 (−0.005, 0.04)          | 0 (ref)                      | −0.002 (−0.01, 0.006)                         |

<sup>a</sup> Adjusted for age, sex, BMI, alcohol consumption, physical activity status, educational level, occupation, smoking status, and neighborhood socioeconomic status; \*  $p < 0.05$ .

## E Wave velocity

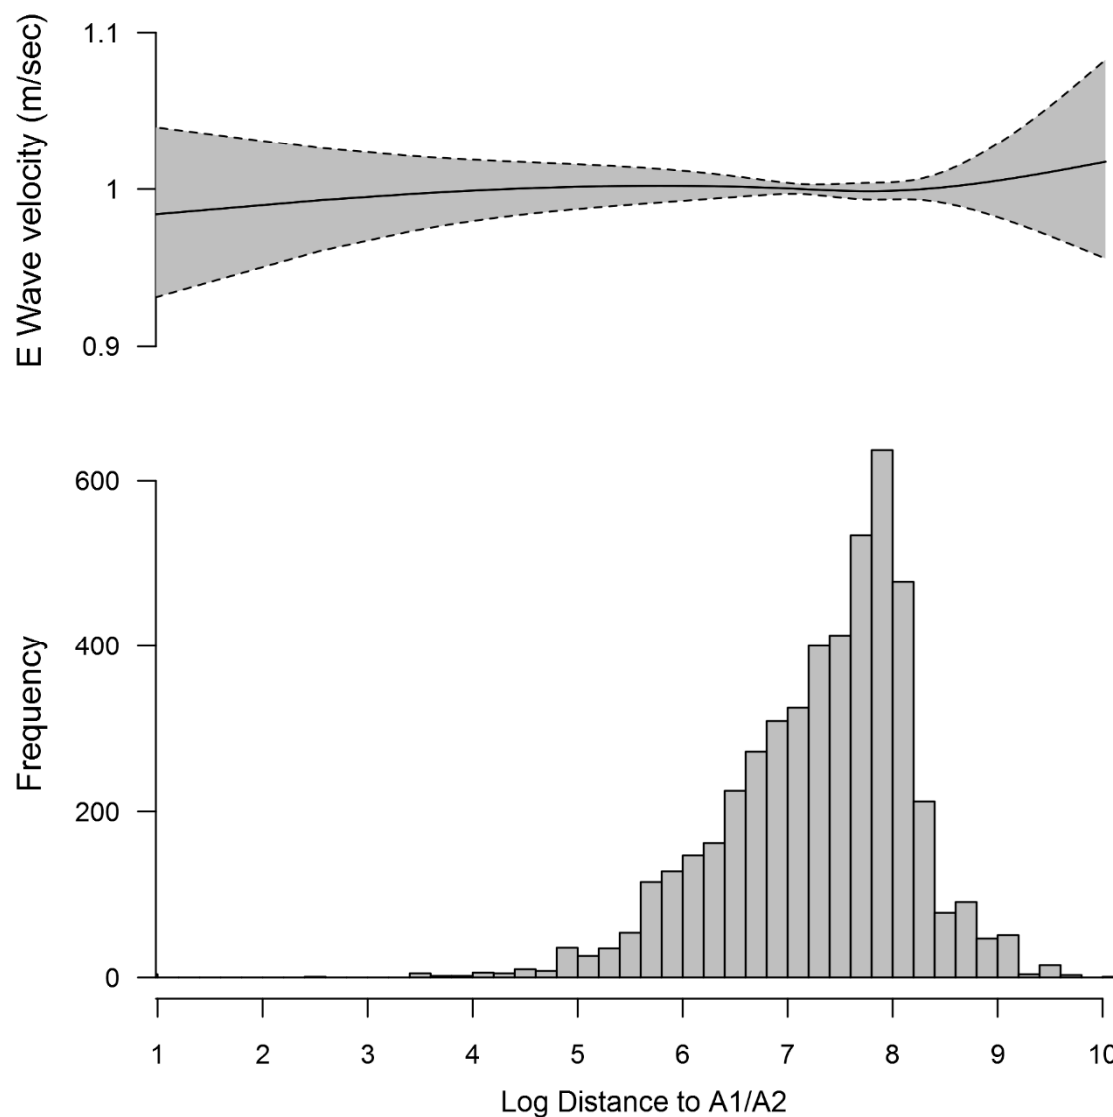

**Figure S1.** Association between E-wave velocity and natural log of residential distance to A1 or A2 roads among participants in the Jackson Heart Study, fitted using a natural spline with 3 degrees of freedom for distance to A1 or A2, adjusting for covariates. Shaded area represents 95% confidence interval. ( $n = 4866$ ) <sup>a</sup>; <sup>a</sup> Adjusted for age, sex, BMI, alcohol consumption, physical activity status, educational level, occupation, smoking status, and neighborhood socioeconomic status.

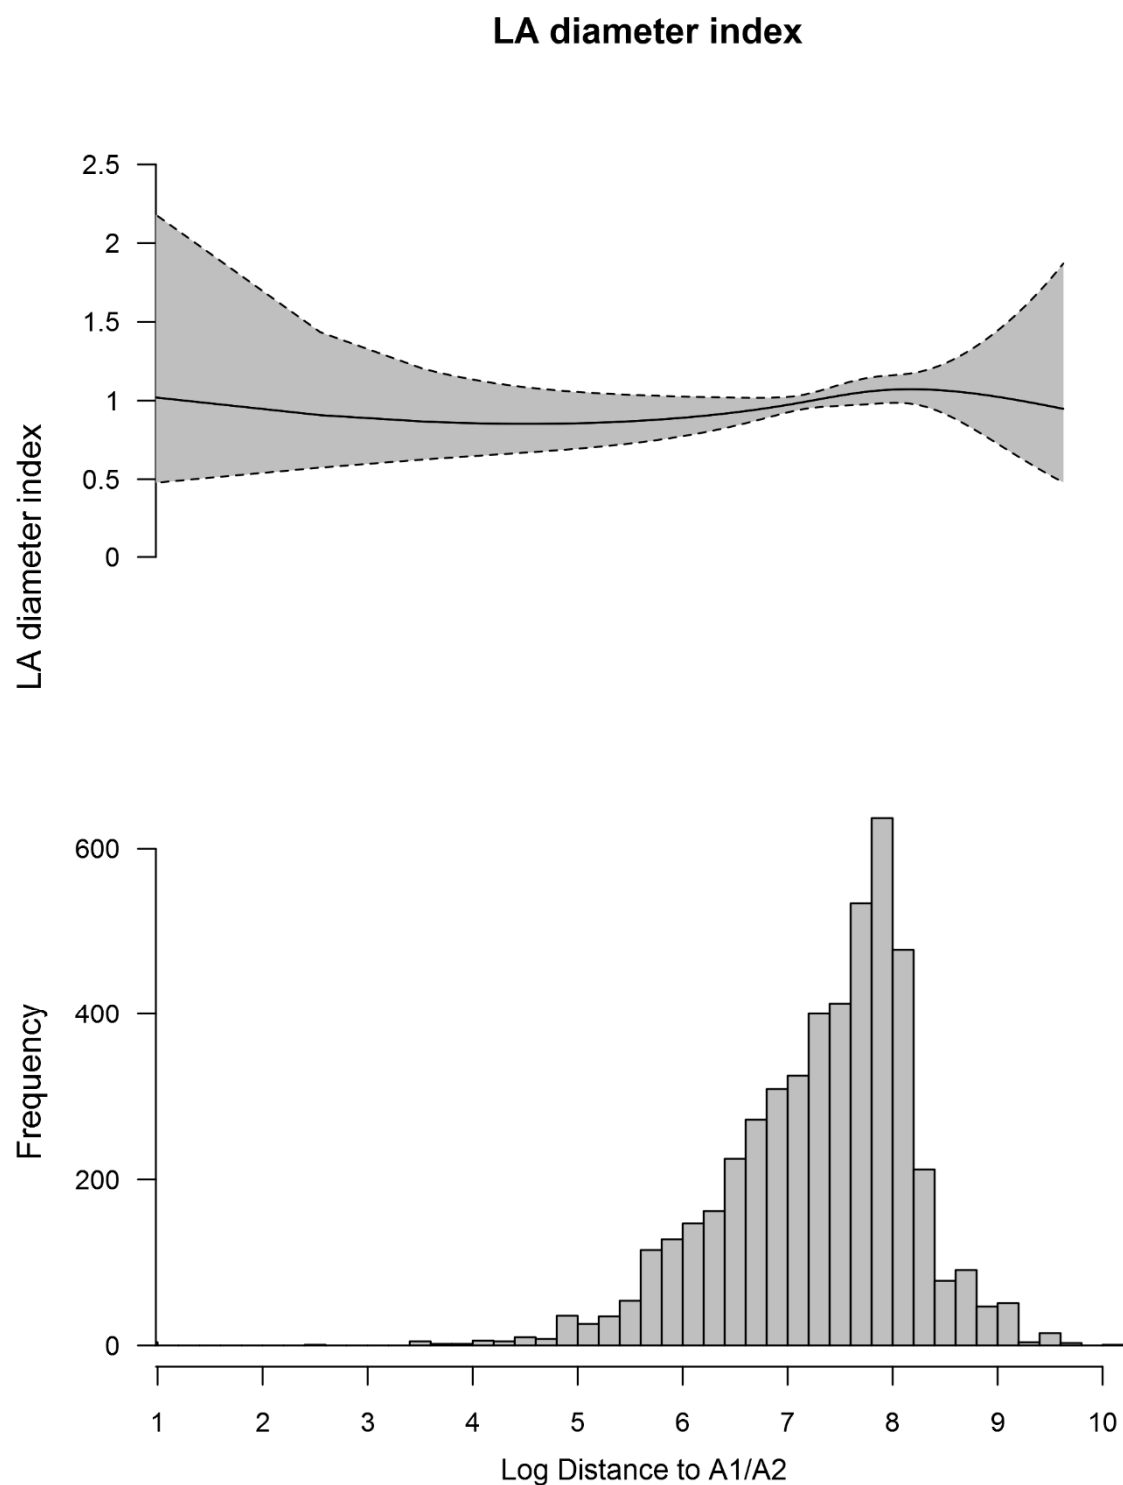

**Figure S2.** Association between LA diameter index and natural log of residential distance to A1 or A2 roads among participants in the Jackson Heart Study, fitted using a natural spline with 3 degrees of freedom for distance to A1 or A2, adjusting for covariates. Shaded are represents 95% confidence interval. ( $n = 4866$ ); \*Adjusted for age, sex, BMI, alcohol consumption, physical activity status, educational level, occupation, smoking status, and neighborhood socioeconomic status.

## Isovolumic relaxation time

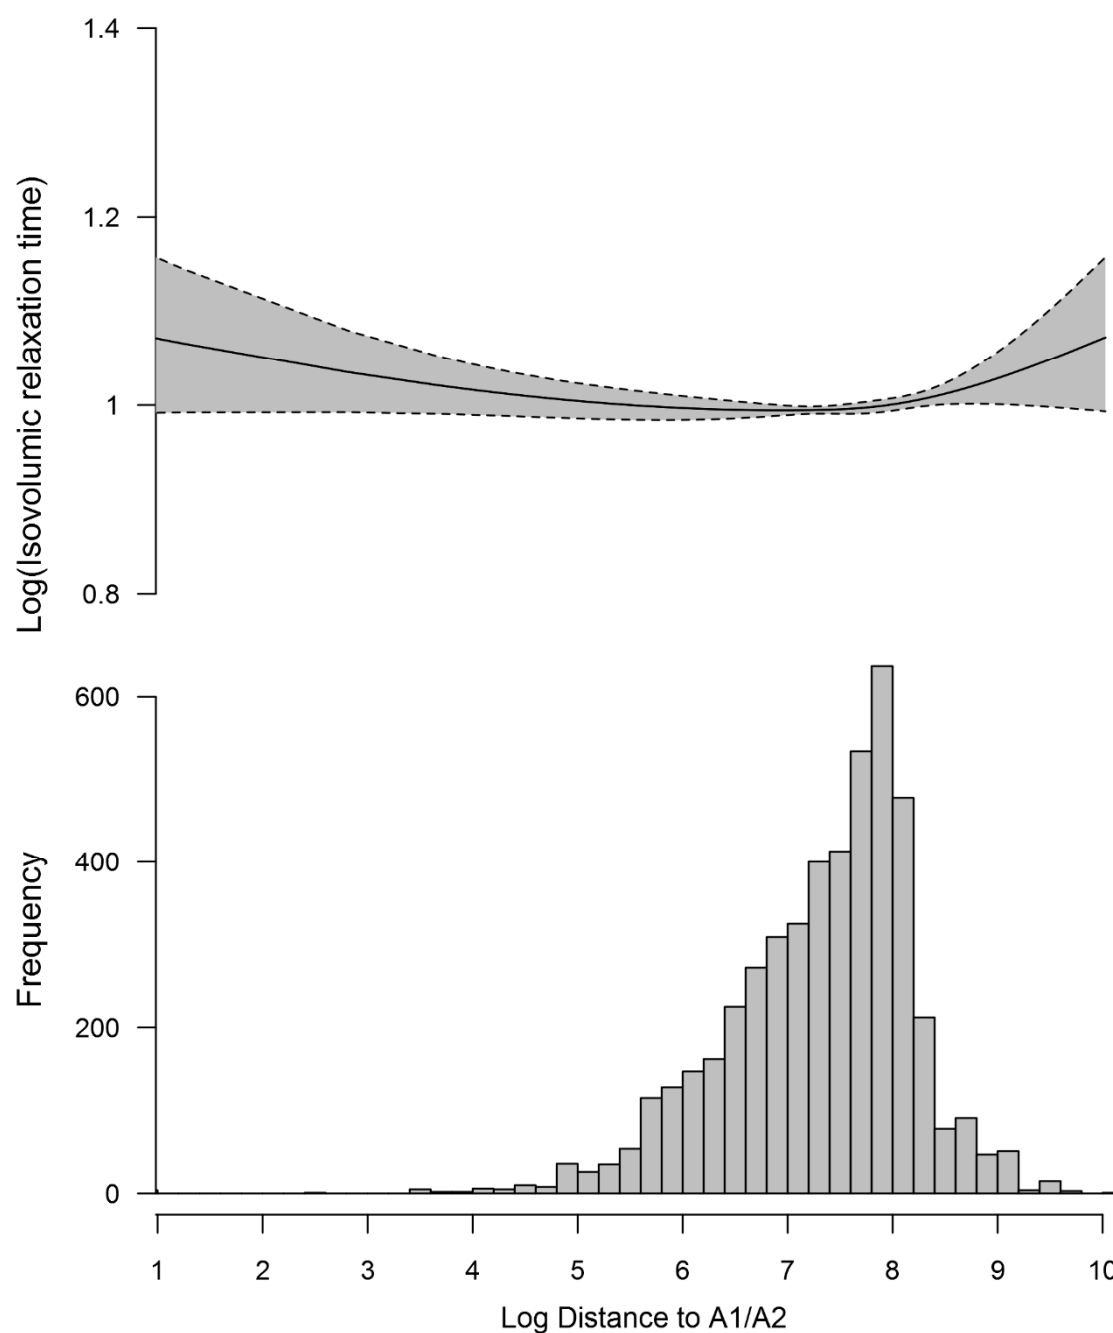

**Figure S3.** Association between natural log isovolumic relaxation time and natural log of residential distance to A1 or A2 roads among participants in the Jackson Heart Study, fitted using a natural spline with 3 degrees of freedom for distance to A1 or A2, adjusting for covariates. Shaded are represents 95% confidence interval. ( $n = 4866$ ) <sup>a</sup>; <sup>a</sup> Adjusted for age, sex, BMI, alcohol consumption, physical activity status, educational level, occupation, smoking status, and neighborhood socioeconomic status.

## Pulmonary Artery Systolic Pressure

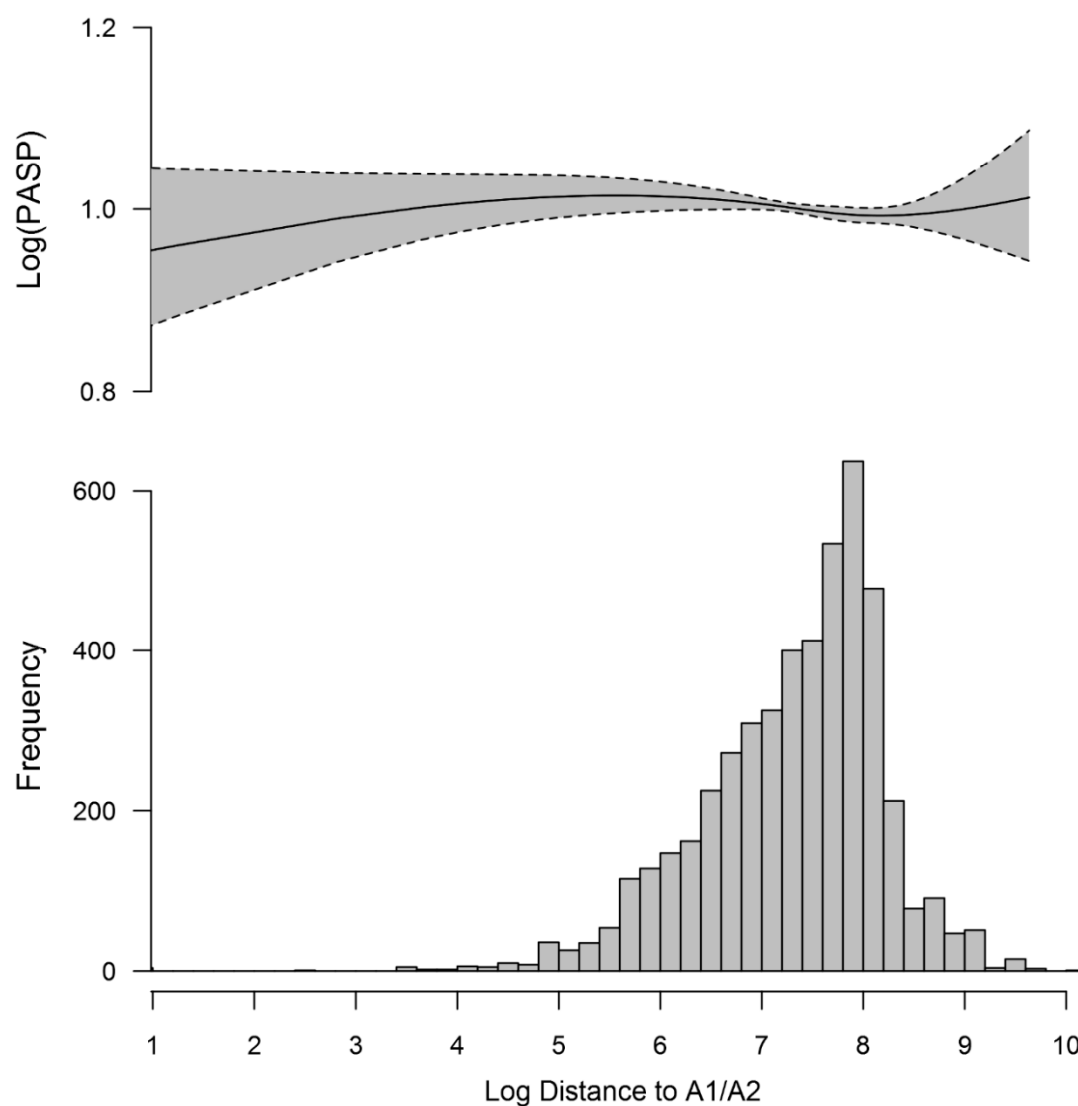

**Figure S4.** Association between natural log PASP and natural log of residential distance to A1 or A2 roads among participants in the Jackson Heart Study, fitted using a natural spline with 3 degrees of freedom for distance to A1 or A2, adjusting for covariates. Shaded area represents 95% confidence interval. ( $n = 4866$ )<sup>a</sup>; <sup>a</sup> Adjusted for age, sex, BMI, alcohol consumption, physical activity status, educational level, occupation, smoking status, and neighborhood socioeconomic status.

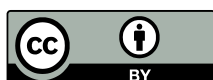

© 2016 by the authors; licensee MDPI, Basel, Switzerland. This article is an open access article distributed under the terms and conditions of the Creative Commons by Attribution (CC-BY) license (<http://creativecommons.org/licenses/by/4.0/>).
